# Supplementary material for: Compositional and genetic alterations in Graves’ disease gut microbiome reveal specific diagnostic biomarkers
Source: PubMed Central journal article supplement (PMC8528855; doi:10.1038/s41396-021-01016-7), 2021-06-02
Supplement: 41396_2021_1016_MOESM1_ESM.pdf [file 41396_2021_1016_MOESM1_ESM.pdf]

## Supplementary figures

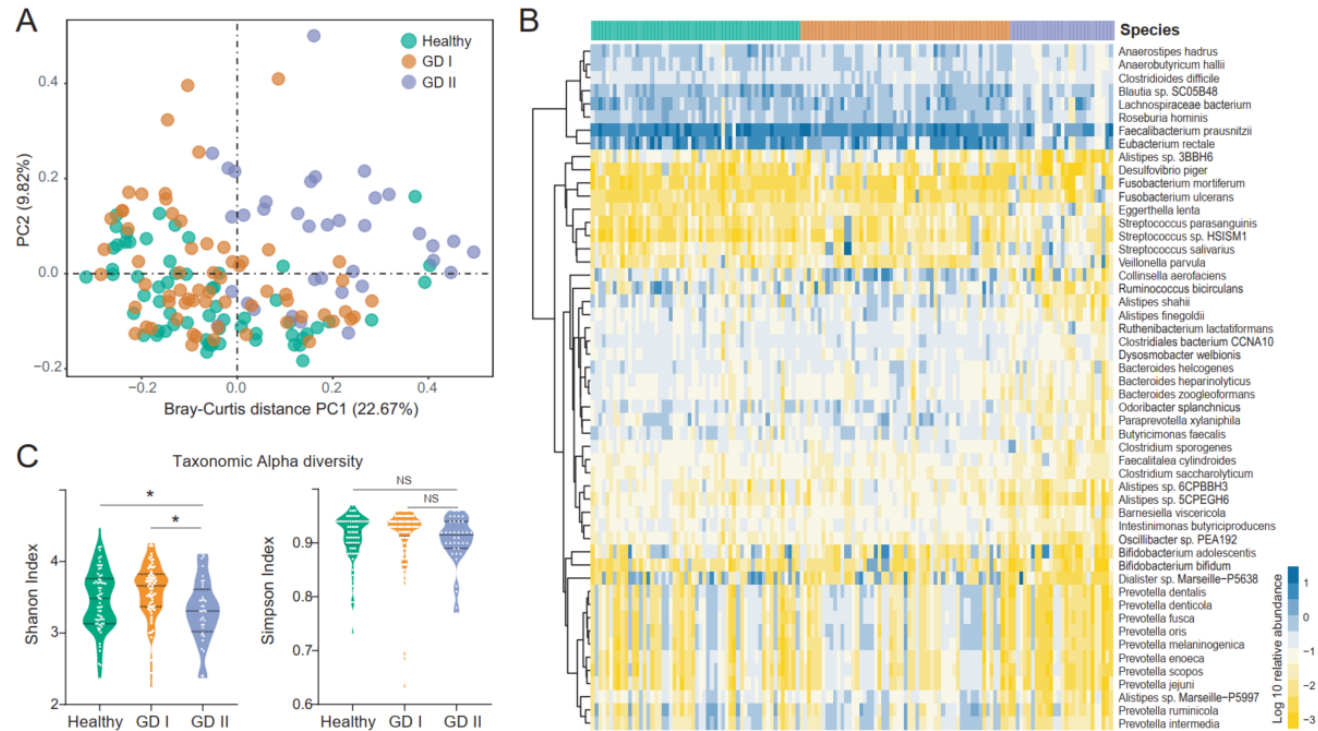

**Figure S1.** Comparative analysis of gut microbiome composition and diversity among the three groups: healthy controls (Health), mild Graves' patients (GD I) and severe Graves' patients (GD II): **A.** Principal coordinate analysis (PCoA) of Bray-Curtis distances among MAG profiles. Each dot represents a human subject and is colored by the host groups. **B.** Heatmap showing log<sub>10</sub>-transformed relative abundance of species-level markers associated with GD states (i.e. Healthy, GD I and GD II). **C.** Distribution of Shannon diversity indices of the three groups. Asterisks: statistical significance ( $* p \leq 0.05$ , NS, not significant)

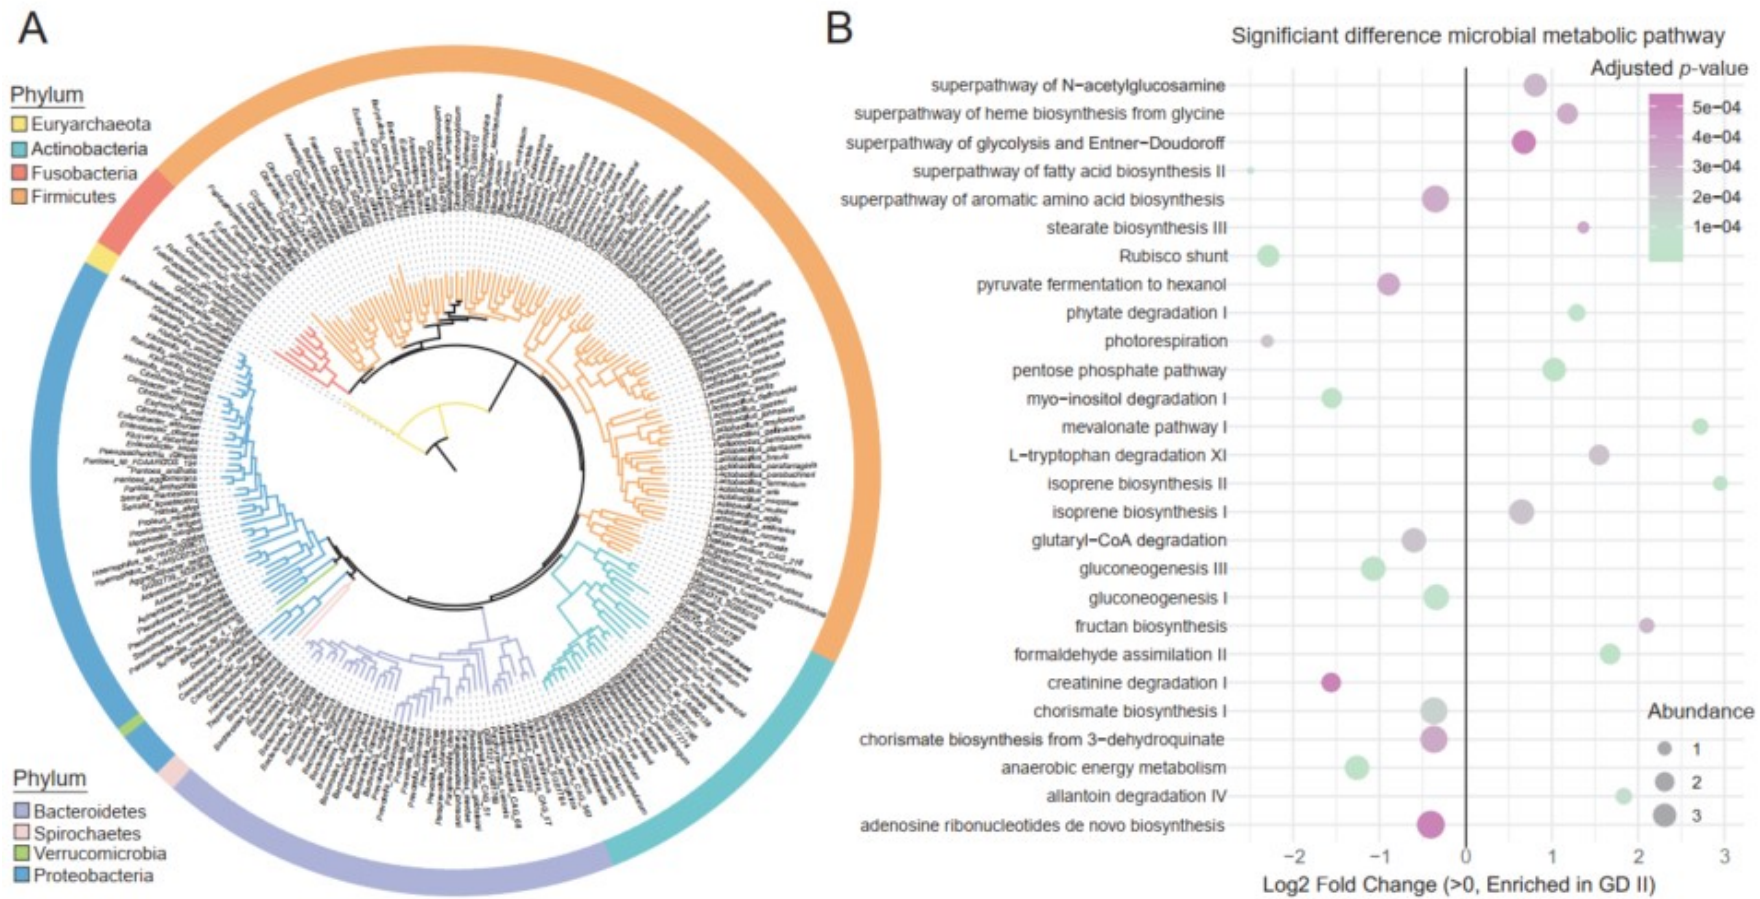

**Figure S2.** **A.** Phylogenomic tree of MAGs recovered from this study, with clades colored by phylum. **B.** The differentially enriched microbial metabolic pathways between the Healthy and GD II groups.

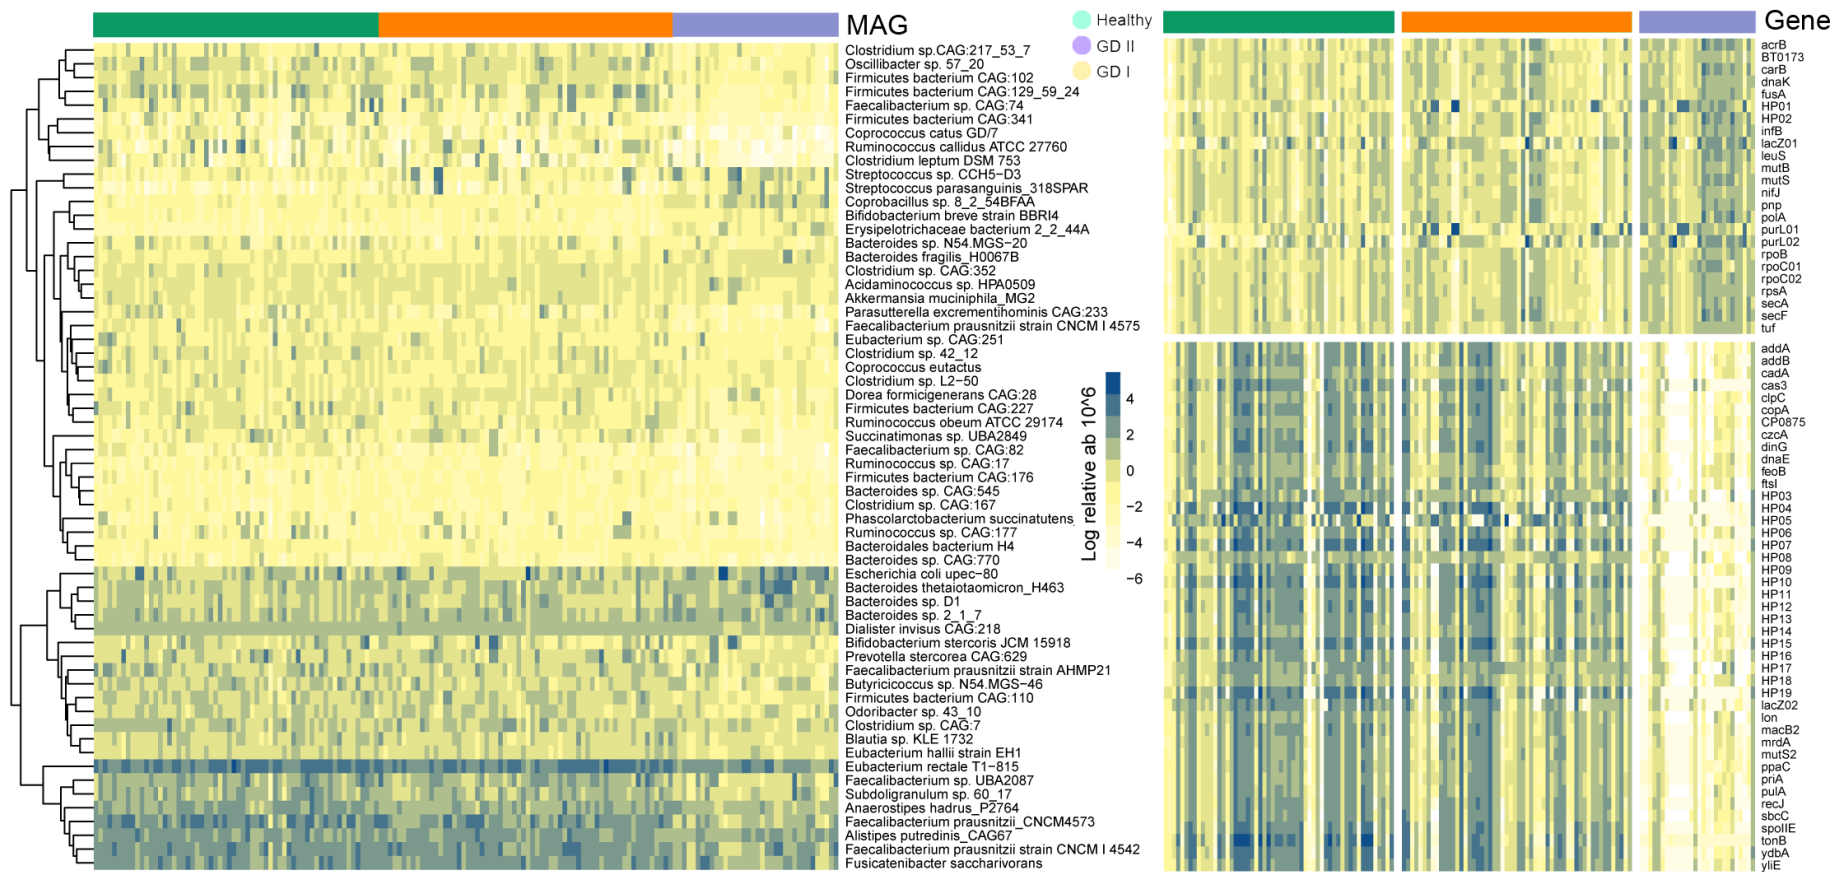

**Figure S3.** The differentially abundant MAGs and MAG-annotated genes in the gut microbiome among human host groups.

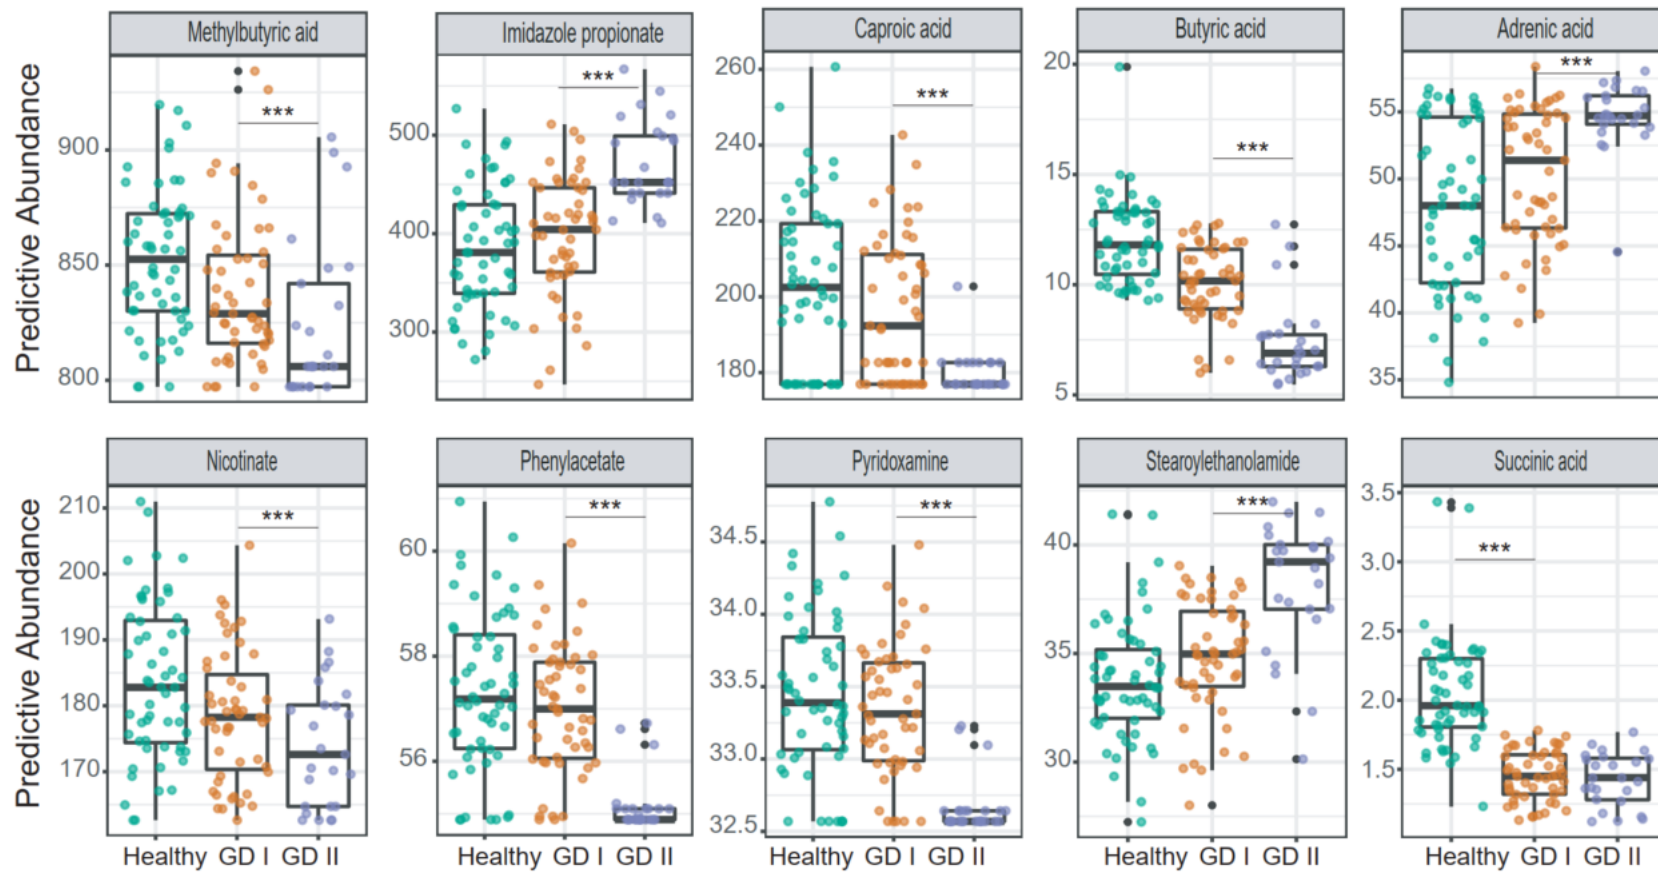

**Figure S4.** The differentially abundant metabolites in the gut microbiome between the healthy controls and severe Graves' patients (GD II).

Asterisks: statistical significance (\*  $p \leq 0.05$ , \*\*  $p \leq 0.01$ , \*\*\*  $p \leq 0.001$ ).

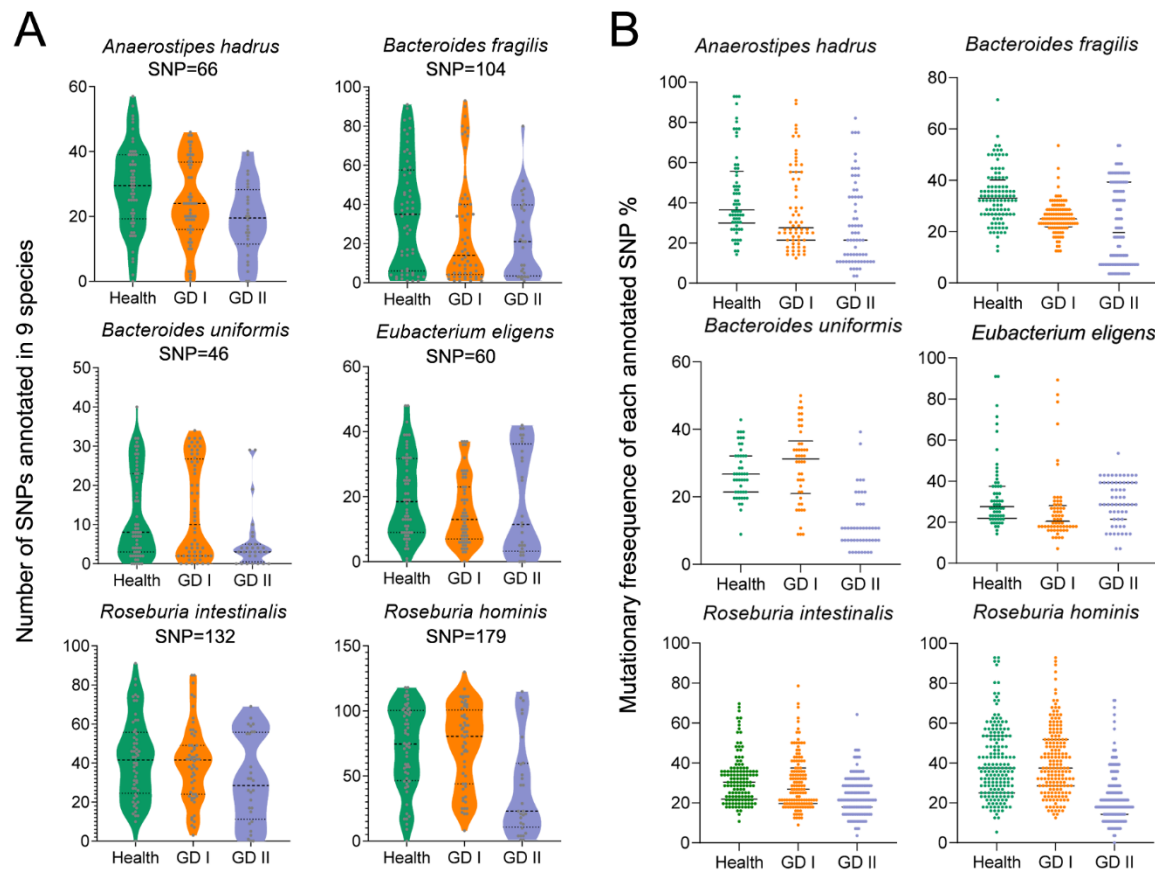

**Figure S5. The SNP profiles of target species in each group. A.** The violin plot shows the distribution of SNPs in a given microbial genome between hosts under different disease states. The number of single-nucleotide mutations (SNPs) in the six prevalent intestinal species ranged from 46 to 179. **B.** The mutational frequency of each SNPs annotated in the intestinal species.

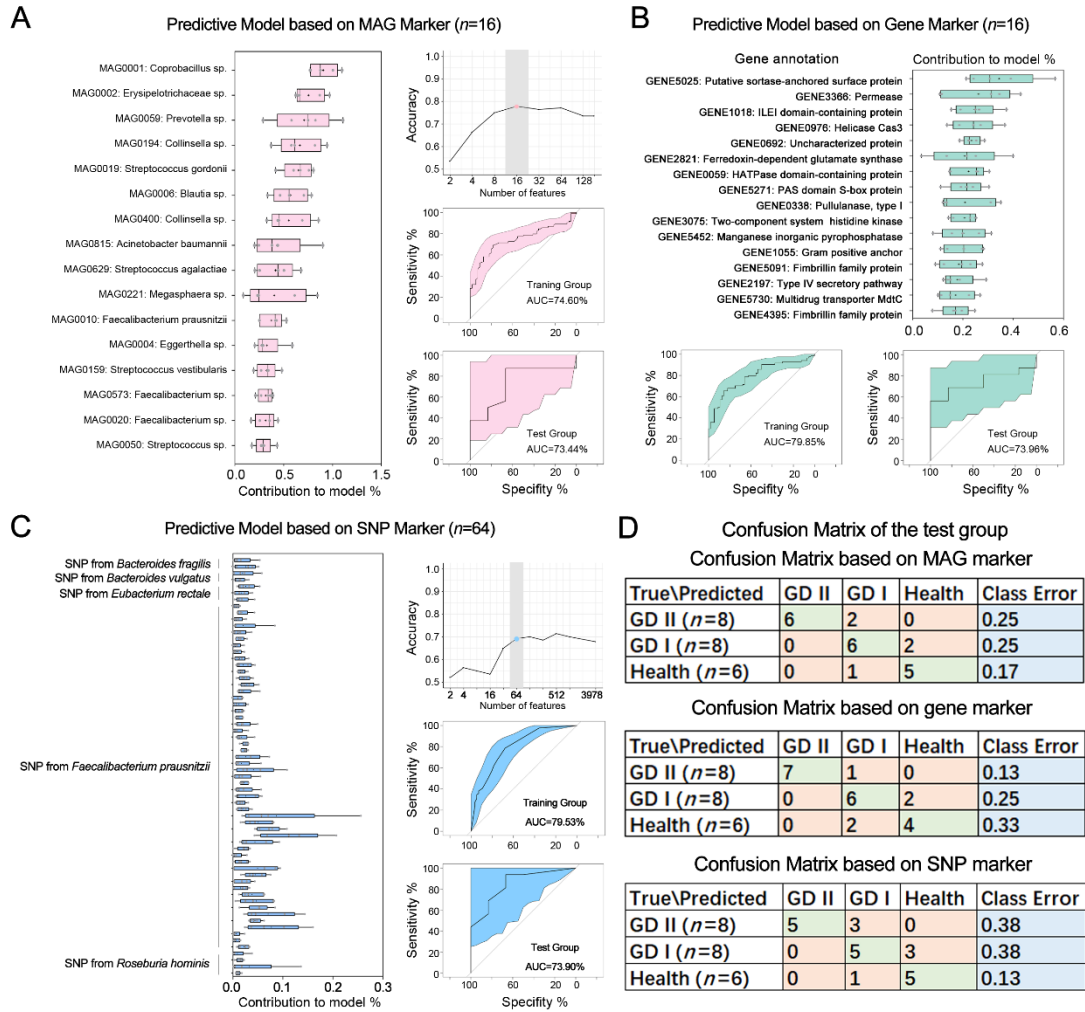

**Figure S6. Identification of GD related intestinal microbial markers and its verification in the test group.** We built predictive models based on the MAGs (**A**), MAG-derived genes (**B**) and SNPs of the specific species markers (**C**). The importance of the biomarkers was ranked according to their quantitative contribution to the predictive model. We also examined how many important features in a reduced model can maximize the prediction accuracy. The prediction performance both in the training and test splits was evaluated by the area under the receiver operating characteristic (AUC). **D**. The confusion matrix of the test split for further validation of the predictive accuracy of the important biomarkers derived from taxonomic profiles, MAG profiles or SNP profiles.

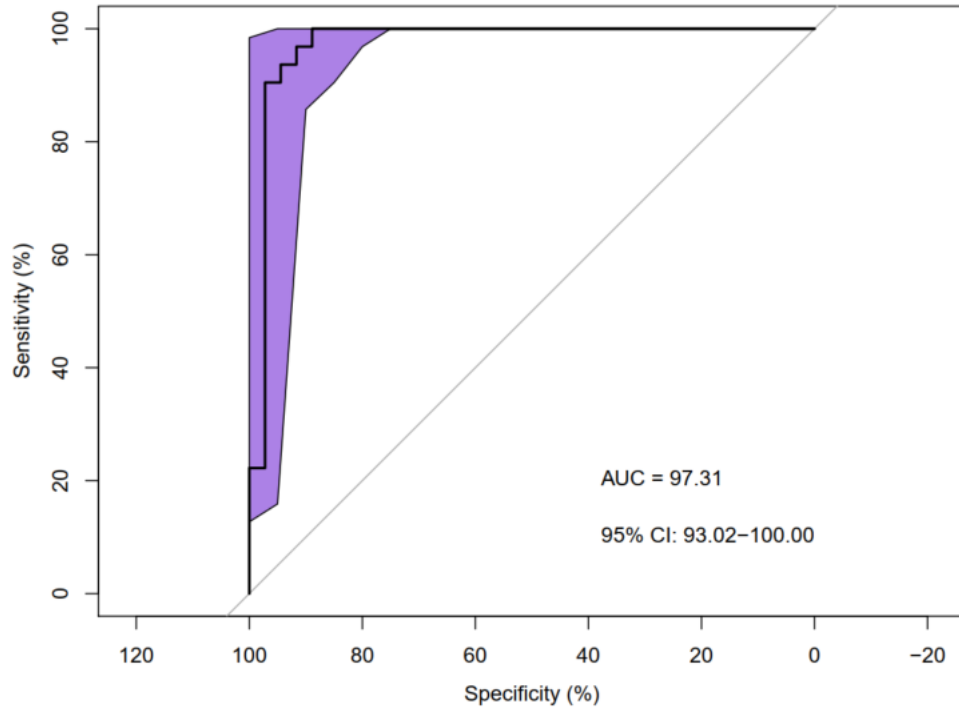

**Figure S7.** The ROC curve of the predictive model based on the five GD-specific biomarkers in the combined cohort of GD and PD patients. The AUC of the five markers reached 97.31% in the cohort.
